# Biomarker Changes after Strenuous Exercise Can Mimic Pulmonary Embolism and Cardiac Injury—A Metaanalysis of 45 Studies

[Farbod Sedaghat-Hamedani](#)<sup>1,2</sup>, [Elham Kayvanpour](#)<sup>1,2</sup>, [Lutz Frankenstein](#)<sup>1</sup>, [Derliz Mereles](#)<sup>1,2</sup>, [Ali Amr](#)<sup>1,2</sup>, [Sebastian Buss](#)<sup>1</sup>, [Andreas Keller](#)<sup>4</sup>, [Evangelos Giannitsis](#)<sup>1</sup>, [Katrin Jensen](#)<sup>3</sup>, [Hugo A. Katus](#)<sup>1,2</sup> and [Benjamin Meder](#)<sup>1,2,\*</sup>

## Author Affiliations

<sup>1</sup> Department of Medicine III, University of Heidelberg, Heidelberg, Germany ;

<sup>2</sup> DZHK (German Centre for Cardiovascular Research), Germany ;

<sup>3</sup> Institute of Medical Biometry and Informatics, University of Heidelberg, Heidelberg, Germany ;

<sup>4</sup> Chair for Clinical Bioinformatics, Saarland University, Saarbrücken, Germany.

\* Address correspondence to this author at : Department of Medicine III, University of Heidelberg, INF 410, 69120 Heidelberg, Germany. Fax +49-(0)6221-564486 ; e-mail [Benjamin.Meder@med.uni-heidelberg.de](mailto:Benjamin.Meder@med.uni-heidelberg.de).

Clinical Chemistry 2015 ; 61 : 1246-1255

激しい運動後に起こるバイオマーカーの変化は、肺塞栓や心臓損傷における変化に似ている ; 45 の研究のメタ解析より

## 概要

**背景 :** 心筋梗塞の診断に用いられるバイオマーカー (心筋トロポニン、高感度心筋トロポニン (hs-cTn) ) や、急性・慢性心不全の可能性を除外するための診断用バイオマーカー (B 型ナトリウム利尿ペプチド (BNP) 、N 末端 proBNP (NT-proBNP) ) 、静脈血栓塞栓症の可能性を除外するための診断用バイオマーカー (D ダイマー) はよく知られている。いくつかの研究により、激しいスポーツにおける心臓機能の急増と、体液中の心臓バイオマーカーの変化の関係が実証され、それは時には緊急の心筋疾患と類似しており、最新技術の臨床評価を妨害することが明らかとなった。

**方法 :** 私たちは、持久力運動の後のバイオマーカーおよび心血管画像の変化について、系統的調査およびメタ解析を行なった。私たちは持久力運動の後にこれらのバイオマーカー、あるいは心臓機能や形態を直接評価した 1997 年から 2014 年までの、英語で発表された観察的研究を探索した。1787 の個別のアブストラクトに、45 の研究が含まれていた。

**結果 :** すべての研究を調査したところ、心筋トロポニン T(cTnT)は調査対象者の 51%(95%信頼区間で 37%–64%)でカットオフ値(0.01ng/mL)を超えていた。基礎値からの変化量は、高感度 cTnT(hs-cTnT) は+26ng/L(95%信頼区間で 5.2–46.0)、cTnI は+40ng/L(95%信頼区間で 21.4– 58.0)、BNP は

+10ng/L(95%信頼区間で4.3–16.6)、NTproBNPは+67ng/L 95%のCI、49.9 ; 84.7)、および、Dダイマーは+262ng/mL(95%信頼区間で165.9–358.7)であった。運動の後に右室拡張終期径は増加し、左室駆出率で重要な変化が観察されない間、右室駆出率は経僧帽弁血流速の左室急速流入血流速度と心房収縮期流入血流速度の比率と同様に減少した。

**結論：**肺塞栓症、急性冠動脈症候群および心不全の臨床診断の中で使用される現在の心血管バイオマーカー(cTnT、hs-cTnT、BNP、NT-proBNP および dダイマー)は、激しい運動により変化する傾向がある。従って、心臓に関する緊急事態が疑われる場合、事態が発生する前に行った運動の内容を考慮に入れることが必要である。

心血管死および総死亡率に与える運動の是非のインパクトは、多く記述されてきた。しかしながら、激しい運動も血液化学的な顕著な変化を引き起こすことが示された(1)。マラソン選手1000人のうち25人の割合で、マラソン競技の後に治療が必要であると推測された(2)。運動に関連した虚脱(EAC)<sup>5</sup>は59%–85%の割合でみられ、最も多くは長時間の激しい運動の後での医療テント内で発生した(3)。EACは通常は良性疾患であるが、いくつかのケースでは恐ろしい生命の危機につながる場合がある(4)。過去数年にわたる多くの研究で、心筋バイオマーカーおよび止血に関連するタンパク質に関する、激しい運動の血中濃度への影響を評価した。さらに、左室(LV)および右室(RV)の機能にて、運動誘発性の変化が起こることが異なる研究でわかった(5)。激しいスポーツの後のバイオマーカーの増加が、バイオマーカー測定値の解釈に大きく影響を与える可能性があるため、スポーツ選手が救急科に受診する際、この問題は臨床的に大変重要である。構造または機能上の障害を除外した、測定値の変化の機序に関する問題を提起する。すべてではないが多数の研究が、心筋の障害が確かに激しい身体運動に起因するかもしれないことを示唆した(6)。しかし、バイオマーカー[心筋トロポニン、d-ダイマーおよびB型ナトリウム利尿ペプチド(BNP)およびN末端 proBNP(NT-proBNP)]の変化と心臓機能の変化の発生率は、それぞれの研究によって大きく異なった。特に、これらの研究の多くの標本サイズは小さいため、バイオマーカーや心臓機能の運動後の変化について、不正確な評価である可能性もあった。

心筋トロポニンは、急性心筋梗塞の診断のために好ましいマーカーであるが、心不全(HF)および不整脈を含む肺塞栓症(PE)および他の急性の命にかかわる合併症を持つ患者でも測定された(7)。緊急治療が予後を改善することに関わるため、早期検診は不可欠である(8)。さらに、急性冠動脈症候群(ACS)の患者や、日常的な診療で認められるACSではないPEや急性HFおよび心筋炎のような循環系に影響する急性の症状の患者において、心筋トロポニンの増加がより悪い予後と関係していることがしばしば報告された(7)。血漿中のd-ダイマーは、静脈血栓塞栓症において高い陰性的中率があるため、それを除外するために臨床的に使用される(9)。BNPあるいはNT-proBNPの血中濃度の循環は、直接心室機能障害の重症度と関係があり、また、カットオフ値により急性か慢性のHFを除外するために使用される。更に、ナトリウム利尿ペプチドは、PEとHFのある患者において、予後の予測となる(10)。RV拡張は、PEを持った患者の約25%で観察された。また、RVの過負荷あるいは機能障害サインの欠如は、ショック症状や低血圧状態にある患者における血行動態不安定から引き起こされるPEを除外することができ、全身的な症状緩和の治療に関する意思決定のための1つの重要なマーカーである(8)。

血中バイオマーカーの濃度の増加は、意図している条件以外の場合でも観察される。例えば、心筋トロポニン測定における臨床的な特異度は、感度の改善を行ったために減少した。心臓組織は血中の心筋トロポニンの特異的な発生源であるが、ACSのない心筋傷害の状態でも生じるかもしれない(11)。したがって、ACSがない状態でのトロポニン濃度が分析結果として増加の方向になることは頻繁にあり、正確な診断に混乱を与えるかもしれない。心筋損傷の可能性として考えられる原因に

ついて、大きなリストが作られている。同様に、ナトリウム利尿ペプチドおよび d-ダイマーの陰性的中率は、交絡因子に起因する異常値によって妨げられる(12)。

メタ解析に関する既存の研究を組み合わせることは、より多いサンプルサイズを提供し、それに伴いバイオマーカーおよび心室パラメーター変動のより正確な評価を提供する。私たちは、マラソンに参加した直後に PE の疑いがある、私たちの緊急処置室に運ばれた健康な女性の事例を最初に報告する。次に、激しい運動の後に心臓のバイオマーカー(心筋トロポニン、BNP および NT-proBNP)、d-ダイマー、RV および LV の機能の変動を調査するために行なった、系統的な調査のメタ解析結果を報告する。

## 症例

35 歳の女性のアマチュアのマラソン選手は、夏の暑さの中で約 10km のマラソンを行った後に虚脱症状を起こし、ハイデンベルグ大学病院の緊急処置室へ受け入れられた。このスポーツ選手には意識があった。彼女は、心疾患、PE あるいは深部静脈血栓症(DVT)の家族歴を持っていなかった。また、彼女は妊娠していなかった。血糖と電解質の濃度は、基準範囲内だった。しかし、臨床検査の結果、高感度心筋トロポニン T(hs-cTnT)の濃度は 73ng/L(99%タイル値は 14ng/L ; ロシュの測定法)、および D-ダイマーの濃度は 9920ng/mL(基準範囲<500ng/mL)を示した。心電図には著しい ST 波の異常はなかったが、洞頻脈(107 bpm)を示した。心エコー検査は正常な RV および LV の機能を示した。3 時間後に、hs-cTnT の濃度は 149ng/mL まで増加した。その間に CT での血管造影検査を行い、PE は除外した。7 時間後に、hs-cTnT 濃度は 97ng/L まで減少した。心筋損傷の可能性を排除するために、非侵襲性手技である心臓の MRI(cMRI)を行なうことにした。71%の LV 駆出率が見られ、心筋損傷や虚血の兆候はなかった。1 日後、hs-cTnT 濃度は 32ng/L まで減少した。運動負荷試験、肺機能検査、頸動脈の超音波および 24 時間ホルター心電図において、病的な所見は示されなかった。4 日間の安静状態でのモニタリングの後に、患者は私たちのクリニックから退院した。彼女の虚脱および cTnT の増加は、マラソン中の脱水症の結果と解釈された。

## 方法

### 研究デザインおよび探索戦略

私たちは、1997 年から 2014 年までの英語で公表された観察研究の、系統的な調査およびメタ解析を行なった。メタ解析は、PRISMA(システマティックレビューおよびメタアナリシスのための優先的報告項目)によって行なわれた(13)。私たちは、cTnT、cTnI、BNP、NT-proBNP、d-ダイマー、あるいは心臓のイメージングデータが、激しい運動前後で評価されたと考えられる前向き研究または対照研究を探索した。私たちは PubMed、EMBASE、ScienceDirect および SportDiscus データベースを探索した。オリジナルの出版物および調査記事の参考文献一覧も注意深く調査した。キーワードは「マラソン」、「トライアスロン」、「運動」、「トロポニン」、「d-ダイマー」、「脳性ナトリウム利尿ペプチド」、「NT-proBNP」、「心エコー検査」、「cMRI」、「心臓のバイオマーカー」、「スポーツ選手」、そして「運動は心臓の損害を引き起こした」だった。

### 文献の選択、データ抽出、および研究内容の質的評価

私たちは、運動終了後 24 時間以内に、成人において cTnT、cTnI、BNP、NT-proBNP、d-ダイマー、右室拡張末期径(RVEDD)、RV-EF、LV-EF、E/A 比 (早期波最大流速/心房収縮期波最大流速) に対

する運動の影響を評価した。私たちは症例報告、レビュー記事、トロポニンの基準範囲の記載が無い研究を除外した。cTnTおよびhs-cTnTに対する陽性値は、0.01ng/mLあるいは14ng/L以上とそれぞれ定義した。

1718の個々の文献のうち、タイトルおよびアブストラクトを確認して1644を除外した(参照 本稿のオンライン版 図.1 <http://www.clinchem.org/content/vol61/issue10>). 2人のレビュアー(F.Sedaghat-Hamedani および E.Kayvanpour)が、独立して74の文献のフルテキストを評価した。これらのうちの29は、症例報告(3)、レビュー記事(5)、メタ解析(3)などとして除外した。2つは、cTnTに対する異なるカットオフ値を持っていた。13は不十分な情報を含んでいた。また、2つは繰り返された研究だった。私たちは、対照群のない実験前後研究用のNHLBI(アメリカ国立心肺血液研究所)品質評価ツールを使用して、適格な研究であるかどうか、研究内容の品質を評価した(14)。レビュアー間の不一致がある場合には、議論、あるいは3番目のレビュアーを交えた一致によって解決した。最終的に識別された45の研究について、著者、年、サンプルサイズ、年齢および性別、運動のタイプ、バイオマーカー、運動持続時間、運動距離、検査方法、運動前後の測定平均値、可能ならばイメージングデータ(オンライン補足の表1-8を参照)を含むデータを抽出した。それぞれのcTnT(従来の分析法および高感度分析法)、cTnI、BNP、NT-proBNPおよびd-ダイマー、RV直径、RV-EF、LV-EFおよびE/A比率データは、別々に抽出し分析した。cTnTを含む研究が33；hs-cTnTを含む研究が4；cTnIを含む研究が12；BNPを含む研究が7；NT-proBNPを含む研究が17；d-ダイマーを含む研究が7；RVEDDを含む研究が8；RV-EFを含む研究が7；LV-EFを含む研究が21；E/A比率を含む研究が16あった(オンライン補足の図1を参照)。cTnTについては、Fortescueらの研究を除き、多くの個人(483人のランナー)においてcTnTとcTnIが共同で評価されていた(18)。研究はすべて、対照群がない運動前後での研究を1つにまとめたものとして分析した。

## 成果

すべての抽出されたバイオマーカーについて、各研究の「ベースラインからの変動」の平均値は、SEを伴うベースラインの平均値と、最終的な平均値の差として引き出した。範囲または四分位範囲を伴う中央値は、Hozoらによって記述されるようなSDを備えた平均値に変換された(16)。ベースラインからの変化のSEは正規近似を使用し、変化前と変化後の比較から抽出されたP値によって得られた(17)。P値が見当たらなかった場合、私たちはベースラインおよび最終SDと、変化前と変化後で仮定した相関係数0.3を使用して、変化前後のSEを入力した(17)。バイオマーカーcTnTおよびhs-cTnTについては、「カットオフ値以上への増加の頻度」は、両方ともにカットオフ値(cTnT 0.01ng/mL以上、およびhs-cTnT 14ng/L以上)を最終的に超える濃度になった個人の割合として定義した。

## 統計的解析

R (バージョン 3.0.2 The R Foundation for Statistical Computing, 2013) のメタパッケージ (バージョン 3.1-2) を使用し、ベースラインからの変化のランダム効果のメタ解析、および定義されたカットオフ値以上への増加の頻度を導いた。ベースラインからの正の変化は、ベースライン値と比較し、より高い最終のバイオマーカー濃度値を表わす。「カットオフ値以上への増加の頻度」が高いほど、耐久性運動後にこのカットオフ値を超過するバイオマーカーを持った者の割合は高くなる。不均一性は $I^2$ 統計によって定量化した。不均一性が認められた場合には、臨床的・方法論的な不均一性の可能性を調査するために、測定感度とサブグループの分析を行なった。文献の偏りについては、調査は行っていないが、Funnel Plot と非対称性検定によって対応した。なぜならば、対称分布の仮定の根底にあり、臨床状況がベースラインから変化することが適切ではないためである。

## 結果

### 心臓バイオマーカーは、激しい運動の後に増加する場合がある

私たちは cTnT、hs-cTnT、cTnI を別々に解析した。合計 1045 人のスポーツ選手を含む 33 の研究で、激しい運動後の cTnT 濃度変化を評価した。運動後に cTnT がカットオフ値以上(0.01ng/mL 以上)になる頻度は、全体で 51%(95%信頼区間、37-64)だった(図. 1)。しかし、研究間の不均一性は統計的に有意な大きさだった( $I^2$ , 97.3% ;  $P < 0.0001$ )。4 つの研究において、身体運動後の hs-cTnT を評価した。これらの研究では、カットオフ値以上(14ng/L 以上)になる頻度は、全体で、83%(95%信頼区間、70-95)だった(オンライン補足の図 2 を参照)。運動前の hs-cTnT の平均濃度は 4ng/L(95%信頼区間、3.0-4.8)であり、運動後は 32ng/L(95%信頼区間、13.5-49.6)まで増加した。身体運動前後の hs-cTnT のベースラインからの変化は 26ng/L(95%信頼区間、5.2-46.0)だった(図. 2)。cTnI については、412 人が含まれる 12 の研究で評価した。運動前の cTnI 濃度平均値は 18ng/L(95%信頼区間、6.4-29.7)で、運動後の平均濃度は 67ng/L(95%信頼区間、49.0-84.2)、身体運動前後の cTnI のベースラインからの変化は 40ng/L(95%信頼区間、21.4-58.0) だった(図. 3)。cTnI についても、研究間での明白な不均一性が観察された。これらの不均一性は、参加者のトレーニング状態と能力の違い、様々な強度を持つ運動の内容の違い、運動後の採血時間の違い、そして心筋トロポニン の測定方法の違いなどで説明することができるかもしれない。

### cTnT

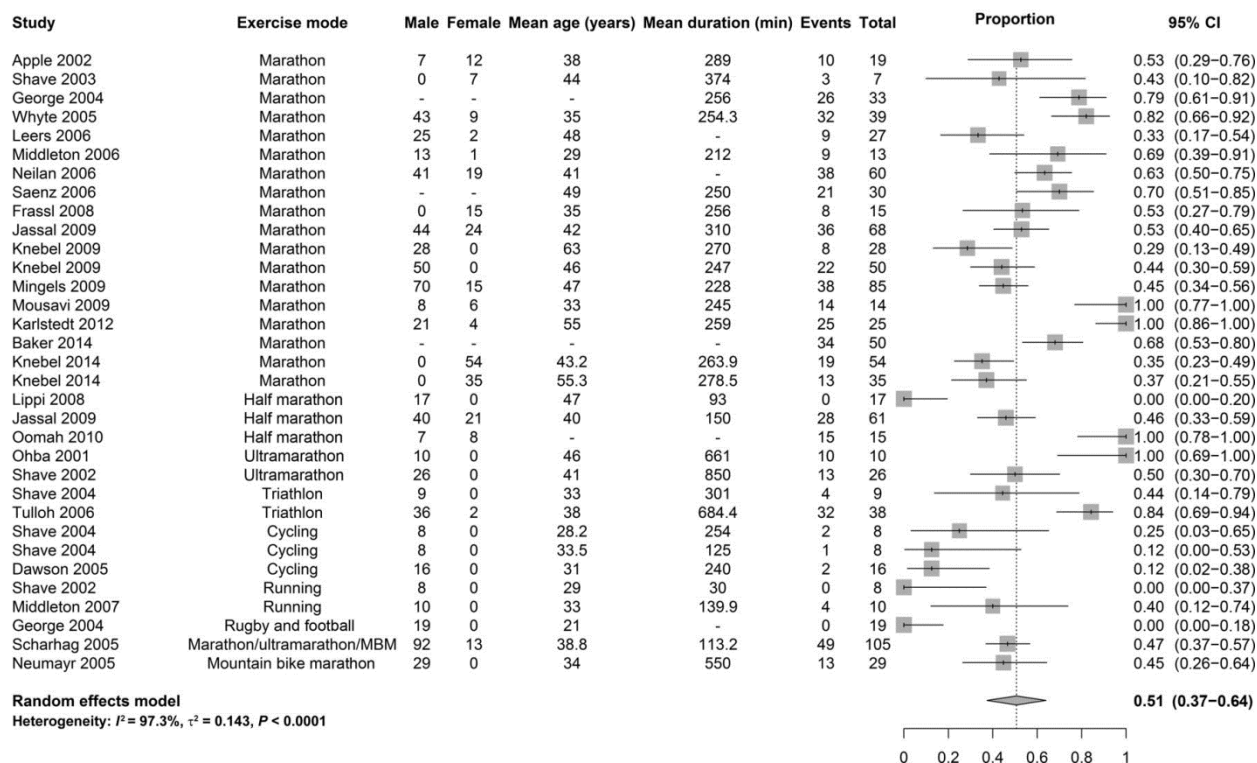

図 1 cTnT のカットオフ値以上(0.01ng/L 以上)への増加頻度のフォレストプロット

使用した研究内容は出版年と運動の内容に沿って並べた。[Apple ら(2002)(59) Baker ら(2014)(47)、Dawson ら(2005)(39) George ら(2004)(37) George ら(2004)(57) Frassl ら(2008)(22) Jassal ら

(2009)(53)、Karlstedt ら (2012)(50)、クネーベルら (2012)(48)、Knebel ら (2009)(52)、Leers ら (2006)(55)、Lippi ら (2008)(49)、Middleton ら (2006)(25)、Middleton ら (2007)(60)、Mingels ら (2009)(51)、Mousavi ら (2009)(21)、Neilan ら (2006)(24)、Neumayr ら (2005)(20)、Ohba ら (2001)(45)、Oomah ら (2010)(46)、Scharhag ら (2005)(36)、Saenz ら (2006)(54)、Scharhag ら (2002)(38)、Scharhag ら (2004)(40)、Scharhag ら (2004)(41)、Scharhag ら (2004)(43)、Scharhag ら (2002)(44)、Scharhag ら (2003)(58)、Tulloh ら (2006)(42)、Whyte ら (2005)(5)]。Jassel ら(2009)、Knebel ら(2009)、そして Knebel ら(2012)については、2つの異なる患者群の研究があり、従って二回分として言及した。MBM はマウンテンバイクマラソン、ハイフンは利用できなかったデータを示す。

## hs-cTnT

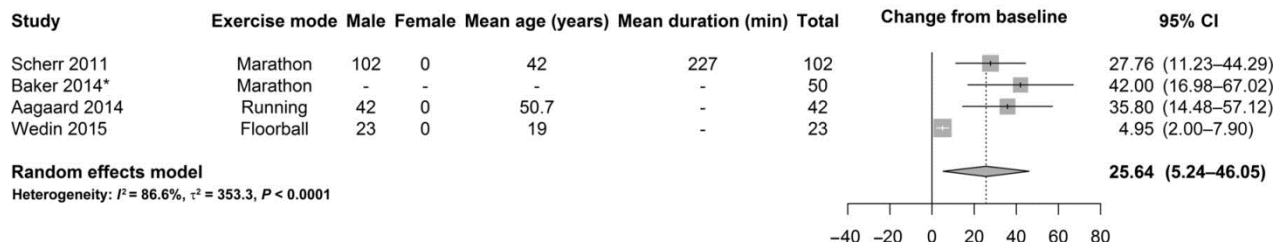

図2 耐久性運動後の hs-cTnT (ng/L)のベースラインからの変化

使用した研究内容は出版年と運動の内容に沿って並べた。[Aagaard ら(2014) 62、Baker ら (2014)(47)、Scherr ら (2011)(63)、Wedin ら (2015)(61)]。\* は、レース前の時点で hs-cTnT が検出限界(3ng/L)より低かった研究で、平均値が 0、SD として 3 を使用した研究である。ハイフンは利用できなかったデータを示す。

## cTnI

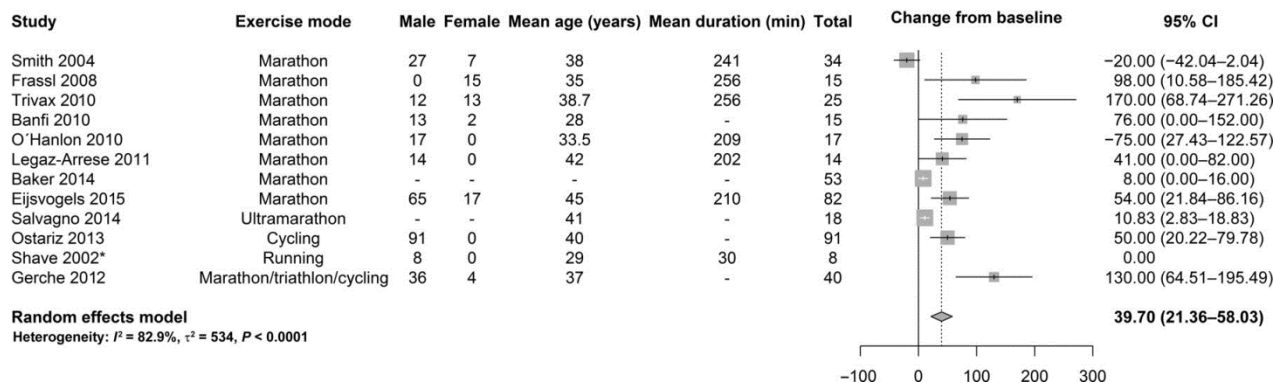

図3 耐久性運動後の cTnI (ng/L)のベースラインからの変化

使用した研究内容は出版年と運動の内容に沿って並べた。[Baker ら(2013)、Banfi ら(2010)(70)、Eijvogels ら (2014)(23)、Frassl ら (2008)(23)、la Gerche ら (2012)(5)、Legaz-Arrese ら (2011)(68)、O'Hanlon ら (2010)(69)、Salvagno ら (2014)(65)、Serrano Ostariz ら (2013)(6)、Shave ら (38)(2002)、Smith ら (2004)(71)、Trivax ら (2010)(70)]。\*、この研究は cTnI が研究のどんな段階でも検出限界(20ng/L)より低かった研究である。ハイフンは利用できなかったデータを示す。

835 人を含んだ 17 の研究では、激しい運動後の NT-proBNP の変化は、67ng/L(95%信頼区間、49.9–84.7)のベースラインからの変化で解析した(図.4A)。BNP については、200 人を対象の 7 つの研究で

評価した。BNP の増加は、ベースラインから 10ng/L(95%信頼区間、4.3-16.6)の変化であり、NT-proBNP ほど明らかではなかった(図. 4B)。NT-proBNP および BNP の統計学的不均一性は、 $I^2$ 、66.1%( $P < 0.0001$ )と  $I^2$  76.9%( $P < 0.0002$ )で、トロポニンでの研究よりそれぞれ低かった。運動内容のサブグループ解析を行なっても、耐久性運動後のバイオマーカー変化に関する研究の不均一性を縮小することはできなかった。

## A NT-proBNP

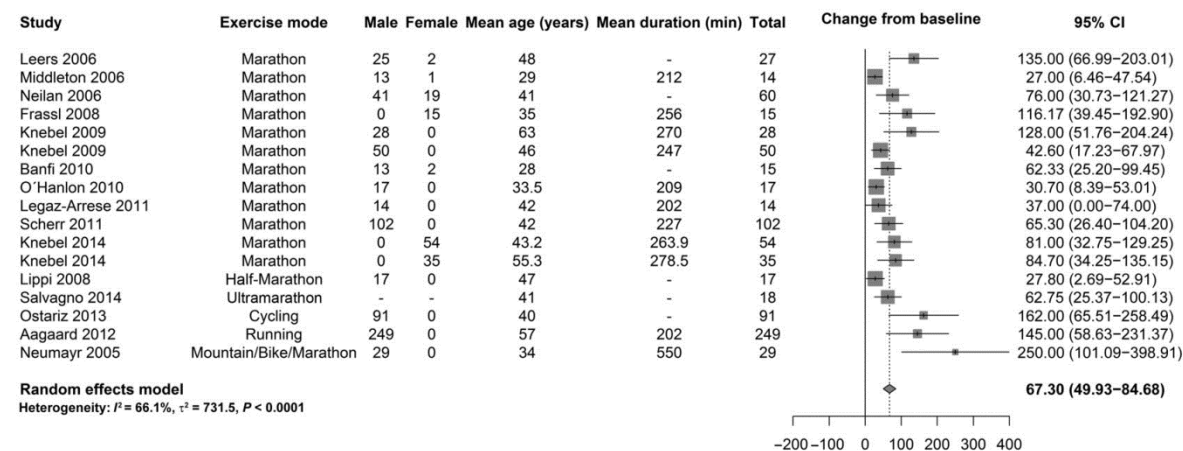

## B BNP

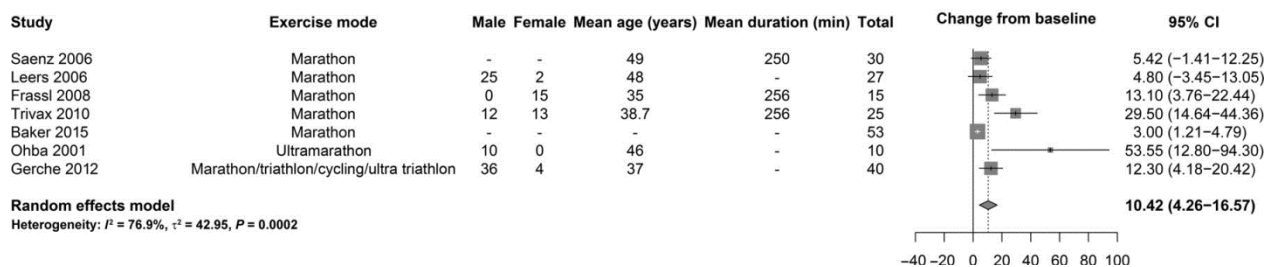

図 4 耐久性運動後の NT-proBNP(ng/L) (A)と BNP(ng/L)(B)のベースラインからの変化

使用した研究内容は、出版年と運動の内容に沿って並べた。(A)、Aagaard ら(2012)(72)、Banfi ら(2010)(69)、Frassl ら(2008)(22)、Knebel ら(2009)(52)、Leers ら(2006)(55)、Legaz-Arrese ら(2011)(67)、Lippi ら(2008)(49)、Middleton ら(2006)(25)、Neilan ら(2006)(24)、Neumayr ら(2005)(20)、O'Hanlon ら(2010)(68)、Salvagno ら(2014)(65)、Serrano Ostariz ら(2013)(64)、(22)、Scherr ら(2011)(63)、Serrano Ostariz ら(2013)(64)。(B)、Baker ら(2014)(47)、Frassl ら(2008)(22)、la Gerche ら(2012)(5)、Leers ら(2006)(55)、Ohba ら(2001)(45)、Saenz ら(2006)(54)、Trivax ら(2010)(70)。ハイフンは利用できなかったデータを示す。

## d-ダイマーは、持久系スポーツ後に著しく増加する

d-ダイマーは高い陰性予測値により、DVT と PE を除外することができるフィブリン分解物であり、146 人を対象の 7 つの研究で評価された。マラソン中の 6 つの研究およびウルトラマラソン中の 1 つの研究において、レース前後の d-ダイマー濃度変化が解析された。すべての症例において、d-ダイマーは、262ng/mL(95%信頼区間、165.9-358.7)のベースラインからの変化が起こり、運動の後に著しく増加した。これらの研究においては、著しい不均一性がなかった(図. 5)。

## D-Dimer

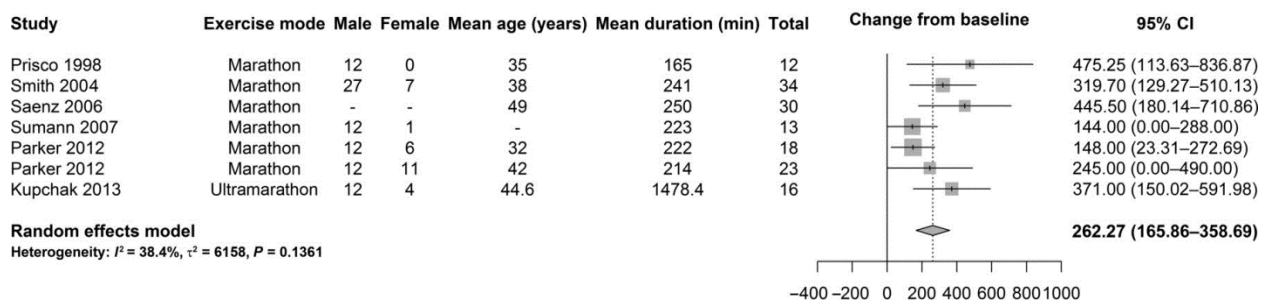

図5 耐久性運動後のd-ダイマー(ng/mL)のベースラインからの変化

使用した研究内容は出版年と運動の内容に沿って並べた。[Kupchakら(2013)(28)、Parkerら(2012)(73)、Priscoら(1998)(27)、Saenzら(2006)(54)、Smithら(2004)(71)、Sumannら(2007)(26)]。Parkerら(2012)には2つの異なる患者群の研究があり、従って二回分として言及した。ハイフンは利用できなかったデータを示す。

### 激しい運動は、LVではなくRVの急性の機能障害を引き起こす場合がある

最後に、RV機能に対する激しい運動の影響については、96人を対象の5つの研究での心エコー検査で、232人を対象の7つの研究(232人の個人)のcMRIで解析した。cMRIと心エコー検査におけるRV-EFとRVEDDの変化は別々に測定した。LV-EFの変化は、501人を対象の17の研究での心エコー検査で、82人を対象の4つの研究でcMRIで測定した。運動後RVEDDは増加し、RV-EFは減少したが、著しい変化はLV-EFでは観察されなかった。cMRIでのRVEDDの増加はベースラインからの変化が12.1mm(95%信頼区間、3.5-20.8)で、心エコー検査での変化3.7(95%信頼区間、-0.7-8.00)よりも明らかだった(図6A)。RVEDDについては、不均一性はcMRIでは観察されなかった；しかしながら、心エコー検査で、統計学的に有意な不均一性が見られた( $I^2$ , 83.1% ;  $P < 0.0001$ )。RV-EFは持久系スポーツの後に前に比べ時的に減少し、心エコー検査ではベースラインからの変化は-7.0%(95%信頼区間、-14.4-0.3)、cMRIでは-8.6%(95%信頼区間、-16.4--0.7)であった(図6B)。LV-EFのベースラインからの変化は心エコー検査で-2.1%(95%信頼区間、-3.6--0.7)、cMRIでは1.9%(95%信頼区間、0.9-2.9)であった(オンライン補足の図3を参照)。さらに16の研究で、運動直後のE/A比率の減少が、LVの心拡張期充満のインデックスとして観察された。心エコー検査でのE/A比率のベースラインからの変化は-0.4(95%信頼区間、-0.5--0.3)だった(オンライン補足の図4を参照)。



## A RVEDD

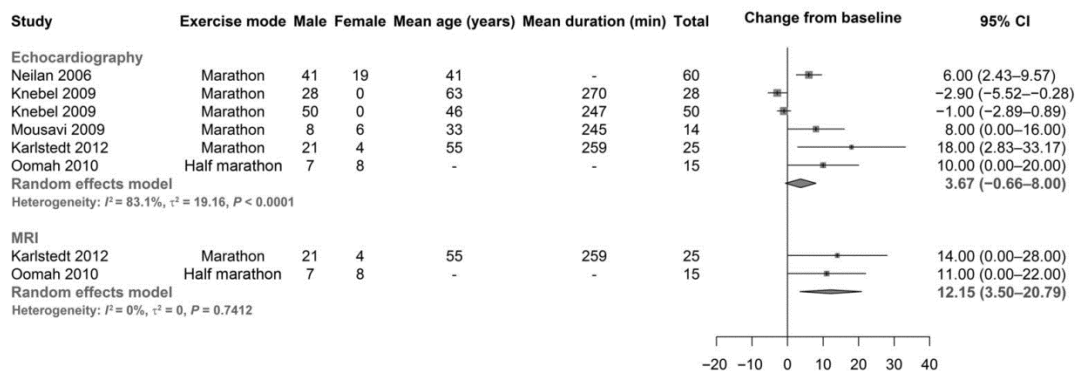

## B RV-EF

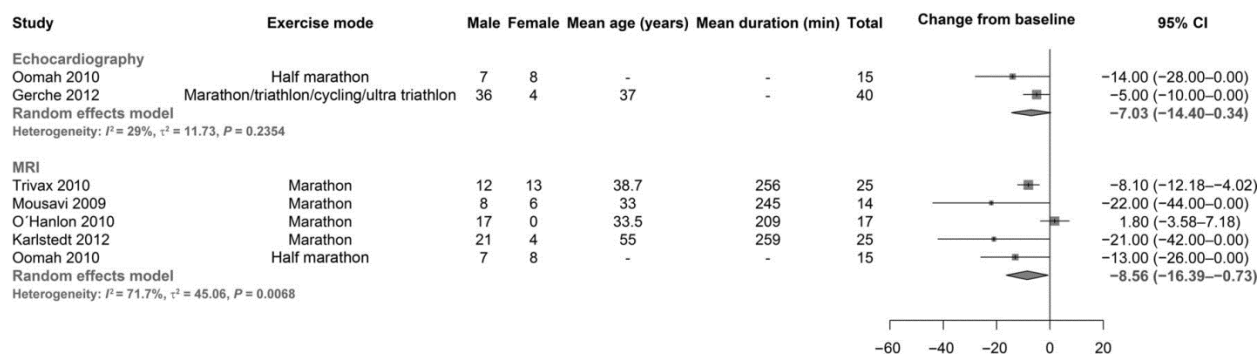

図6 心エコー検査とMRI検査でのRV機能評価

耐久性運動後のRV-EFおよびRVEDDのデータは、別々に評価した。ベースラインからのRVEDDの変化(mm)(A)と、RV-EFの変化(%) (B)が測定した。使用した研究内容は出版年と運動の内容に沿って並べた。[Karlstedtら(2012)(50)、Knebelら(2009)(52)、la Gercheら(2012)(5)、Mousaviら(2009)(21)、Neilanら(2006)(24)、Oomahら(2010)(46)、O'Hanlonら(2010)(68)、Trivaxら(2010)(70)]。ハイフンは利用できなかったデータを示す。

## 考察

多数の研究において、運動後に心筋トロポニン、BNP、NT-proBNPのような心臓のバイオマーカーの増加が報告された。そのような心臓のバイオマーカーの発生や増加は、通常、心臓病患者の心筋損傷やHFを反映する。私たちは、激しい運動後のバイオマーカーと、心臓機能の変化を評価した研究の系統的な調査およびメタ解析を行なった。私たちは、運動後の心筋トロポニン、BNP、NT-proBNPおよびd-ダイマーの、統計的に著しい増加を実証した。マラソンやトライアスロンのような耐久系運動後のバイオマーカーの、急性の変化および心臓機能変化が本レビューで示され、入院や広範囲な侵略的・非侵入性の治療などの対応方法の選択に結びつけることができる。

ほとんどの研究において、運動後に心筋トロポニンの著しい増加が示された。全体で約51%の個人において心筋トロポニンが解析され、少なくとも3世代目の測定法の検出限界(0.01ng/mL)以上のcTnTの増加が示された。26の研究を含むShaveらのメタ解析、16の研究を含むRegwanらのメタ解析に対し、全体的に47%および51%の割合で、33の研究を含む私たちのメタ解析は似た結果となっ

た(6, 17)。Fortescueらの大きな観察研究は、ボストン・マラソンの482人のランナーのほとんどである68%が、cTnTまたはcTnIの増加を示すと報告した(18)。Shaveらのメタ解析は、cTnT増加の評価としては、FortescueらのcTnTとcTnIを区別しなかった、正確ではない研究を含んだ点に留意する必要がある。対象者の約半分でcTnTの濃度は運動後に0.01ng/mLを超えており、83%でhs-cTnTの増加(95%信頼区間、14ng/L)が示された。運動が心筋細胞の膜透過性を増加させた可能性があり、トロポニンの運動誘発性の増加は細胞質のcTnTおよびcTnIの放出による可能性がある(19, 20)。この可逆的な薄膜漏出は、心筋細胞に対する機械的ストレスの増加、遊離基を生み出す過負荷、上昇した体温、あるいは長いアシドーシスによるものかもしれない(19, 21)。

BNPおよびNT-proBNPのほとんどは、全体量の増加や圧負荷および心筋のストレスに応じて、心室から流出される(22)。これらの心筋ペプチドは、HFのある患者か、あるいは心壁に対する圧力などの他の原因も、同一に考えられる強力なバイオマーカーである。PE、ACSおよびHFの患者において、BNPやNT-proBNPが高濃度になることは、死亡率の増加に関係している(23)。BNPやNT-proBNPの著しい増加は、心拡張期充満の変化によるものに観察された(24)。長い運動による心拍出量の増加からの拡張終期圧の増加は、さらにBNPやNT-proBNPを流出させる(25)。私たちの解析では、NT-proBNPの増加はBNPより大規模だった。これは、これらの蛋白質やペプチドの消失パターンが異なることによるかもしれない。NT-proBNPの半減期は120分なのに対し、BNPは約20分である。また、BNPは主にエンドペプチターゼによって消失させられる。しかし、NT-proBNPの消失は、主として糸球体からのろ過によるものである(22)。

d-ダイマーは、DVTとPEや急性大動脈炎症候群の患者で、高い陰性予測を行うことに広く使用されるフィブリンの酵素的二次分解物である(26-28)。このメタ解析は、激しい運動後のd-ダイマーの著しい増加を実証した。それは、臨床状況における血栓症の発生と同様のものである。身体運動は血小板、血液凝固および繊維素溶解の活性化に結びつく(29)。繊維素溶解は組織プラスミノゲン活性化因子(tPA)の放出に起因するかもしれない(1)。また、身体運動中に生じる可能性があるカテコールアミン、バソプレシン、エピネフリンの遊離、低血糖症、トロロンビンの増加、血管全体へのストレスおよび筋肉損傷は、血管の内皮細胞からtPAを放出し、d-ダイマー濃度の増加に結びつくかもしれない(1, 28)。しかしながら、異なる研究の中でcTnI、BNPおよびd-ダイマーについて、異なる分析値が出された問題が起こったことには言及すべきである。基準範囲上限でのSEを超える増加について、%で評価した研究がないため、メタ解析でこの%を抽出し、統合することができないかもしれない。従って私たちは、各々のベースラインからの変化についての解析結果を統合した。

急性のPEが、より悪い予後を予測するRV拡大と不全に結びつく場合があることは有名である(30, 31)。対照的にいくつかの研究は、予後徴候の因果関係のない激しい運動の後のRV収縮と、RV拡大は一過性的に抑制されると報告した(5, 21, 24)。これらの一過性的な変化は、運動誘発性の肺高血圧症あるいは容積負荷によるかもしれない(21)。RVEDDの増加は1mmの変化)で、より明らかであった。cMRIは心臓超音波よりRV容積と心エコー検査(ベースライン、から3.7mmの変化)と比較して、cMRI測定(ベースラインから12機能の推定がより正確かもしれないので、cMRIに基づいて計算されたベースラインからの変化)は心エコー検査より信頼できる可能性がある(32)。ほとんどの研究の持久系スポーツの後にLV-EFは著しく変わらなかったため、急性のLV機能障害は観察されなかった。LV-EFに関して私たちの結果は、Middletonら(1984年と2005年の間に報告された18の研究のLV機能のメタ分析を行なった)が報告した以前の結果に似ていた(33)。彼らは、ベースラインからのLV-EFの-1.9%(95%信頼区間、-1.0--2.9)の平均値の変化を統計学的には有意、生理学的には無関係と解釈した。心拡張期機能に関して、E/A比率の著しい減少が観察され、心拡張期充満が運動直後に危険にさらされることを示した。

いくつかの研究は、耐久性スポーツ選手における不整脈性のRV心筋症、あるいは心房細動のような不整脈の障害の増加を報告した(34)。最近の研究は、反復継続運動後にLVではなく、RVで主に不整脈基質が現れることを示唆した(5)。動物モデルでは、激しい運動において、RV特異的な線維症などのRVでの発現と同様に、右心房でも左心房でもトランスフォーミング成長因子の発現増加を引き起こした(35)。cMRIは局所的な遅延ガドリニウム造影(LGE)を示すことができた。それは耐久性スポーツ選手での繊維化面積に相互に関連する。全ての場合において、局所的なLGEは、RVの挿入部位での心室中隔が最も頻繁に識別された(5)。心室性頻脈性不整脈および心臓性突然死の基質として働くこれらの繊維症のパッチも、心筋症の患者で見つかった(35)。

私たちは解析の結果、cTnT、hs-cTnT、cTnI、NT-proBNP、BNP、d-ダイマーの濃度は、耐久性運動の後に著しく増加する場合があると結論づけた。さらに、一時的なRV拡大および機能障害が観察された。これらの変化はすべてPE、ACS、HF、心外傷とよく似ているのである。したがって、激しい運動後に増加した心臓バイオマーカーを正確に解釈することが重要である。心筋トロポニンを連続的に測定することは、心筋トロポニンの生理学および病理学的変化を区別することに役立つかもしれない。しかしながら、私たちのケース報告で示されるように、心筋トロポニンの測定値は急性疾患のものによく似ている(4)。従って、持久系スポーツ後のPEや心筋損傷の診断は、血液検査結果だけではなく、すべての利用可能な臨床の情報に基づいてなされるべきである(4, 8)。この現象についての意識が不足することで、高価で有害になるかもしれない不必要な侵襲性の治療を行ってしまう可能性がある。更に、耐久性運動後のスポーツ選手において、microRNAsのような新しいバイオマーカーにより、病理学的心筋損傷が除外できる可能性がある。これらを検討することは興味深いことである。

(訳者：柳田 小百合)

## Footnotes

<sup>5</sup> Nonstandard abbreviations :

EAC,  
exercise-associated collapse ;  
LV,  
left ventricular ;  
RV,  
right ventricular ;  
BNP,  
B-type natriuretic peptide ;  
NT-proBNP,  
N-terminal proBNP ;  
PE,  
pulmonary embolism ;  
HF,  
heart failure ;  
ACS,  
acute coronary syndrome ;  
DVT,  
deep vein thrombosis ;  
hs-cTnT,

high-sensitivity cardiac troponin T ;  
cMRI,  
cardiac MRI ;  
EF,  
ejection fraction ;  
RVEDD,  
RV-end diastolic diameter ;  
E/A ratio,  
ratio of early (E) to late (A) transmitral flow ;  
tPA,  
tissue plasminogen activator ;  
LGE,  
late gadolinium enhancement.

**Author Contributions :** *All authors confirmed they have contributed to the intellectual content of this paper and have met the following 3 requirements : (a) significant contributions to the conception and design, acquisition of data, or analysis and interpretation of data ; (b) drafting or revising the article for intellectual content ; and (c) final approval of the published article.*

**Authors' Disclosures or Potential Conflicts of Interest :** *Upon manuscript submission, all authors completed the author disclosure form. Disclosures and/or potential conflicts of interest :*

**Employment or Leadership :** None declared.

**Consultant or Advisory Role :** E. Giannitsis, Roche Diagnostics.

**Stock Ownership :** None declared.

**Honoraria :** None declared.

**Research Funding :** None declared.

**Expert Testimony :** None declared.

**Patents :** H.A. Katus, patent number : 6376206.

Received for publication March 13, 2015.

Accepted for publication June 18, 2015.

© 2015 American Association for Clinical Chemistry

## References

1. Womack CJ, Nagelkirk PR, Coughlin AM. *Exercise-induced changes in coagulation and fibrinolysis in healthy populations and patients with cardiovascular disease. Sports Med* 2003 ; 33 : 795–807.
2. Asplund CA, O'Connor FG, Noakes TD. *Exercise-associated collapse : an evidence-based review and primer for clinicians. Br J Sports Med* 2011 ; 45 : 1157–62.
3. Holtzhausen LM, Noakes TD. *The prevalence and significance of post-exercise (postural) hypotension in ultramarathon runners. Med Sci Sports Exerc* 1995 ; 27 : 1595–601.
4. Whyte G, Stephens N, Senior R, George K, Shave R, Wilson M, Sharma S. *Treat the patient not the blood test : the implications of an increase in cardiac troponin after prolonged endurance exercise. Br J Sports Med* 2007 ; 41 : 613–5 ; discussion 615.
5. La Gerche A, Burns AT, Mooney DJ, Inder WJ, Taylor AJ, Bogaert J, et al. *Exercise-induced right ventricular dysfunction and structural remodelling in endurance athletes. Eur Heart J* 2012 ; 33 : 998–1006.
6. Shave R, George KP, Atkinson G, Hart E, Middleton N, Whyte G, et al. *Exercise-induced cardiac troponin T release : a meta-analysis. Med Sci Sports Exerc* 2007 ; 39 : 2099–106.
7. Giannitsis E, Katus HA. *Cardiac troponin level elevations not related to acute coronary syndromes. Nat Rev Cardiol* 2013 ; 10 : 623–34.
8. Torbicki A, Perrier A, Konstantinides S, Agnelli G, Galie N, Pruszczyk P, et al. *Guidelines on the diagnosis and management of acute pulmonary embolism : The Task Force for the Diagnosis and Management of Acute Pulmonary Embolism of the European Society of Cardiology (ESC). Eur Heart J* 2008 ; 29 : 2276–315.
9. Wells PS, Anderson DR, Rodger M, Stiell I, Dreyer JF, Barnes D, et al. *Excluding pulmonary embolism at the bedside without diagnostic imaging : management of patients with suspected pulmonary embolism presenting to the emergency department by using a simple clinical model and d-dimer. Ann Intern Med* 2001 ; 135 : 98–107.
10. Berger R, Huelsman M, Strecker K, Bojic A, Moser P, Stanek B, Pacher R. *B-type natriuretic peptide predicts sudden death in patients with chronic heart failure. Circulation* 2002 ; 105 : 2392–7.
11. Thygesen K, Alpert JS, White HD, Jaffe AS, Apple FS, Galvani M, et al. *Universal definition of myocardial infarction. Circulation* 2007 ; 116 : 2634–53.
12. Pulivarthi S, Gurram MK. *Effectiveness of d-dimer as a screening test for venous thromboembolism : an update. N Am J Med Sci* 2014 ; 6 : 491–9.
13. Moher D, Liberati A, Tetzlaff J, Altman DG. *Preferred reporting items for systematic reviews and meta-analyses : the PRISMA statement. J Clin Epidemiol* 2009 ; 62 : 1006–12.
14. NHLBI, RTI International. *Quality assessment tool for before-after (pre-post) studies with no control group, 2014. [http : //www.nhlbi.nih.gov/health-pro/guidelines/in-develop/cardiovascular-risk-reduction/tools/before-after](http://www.nhlbi.nih.gov/health-pro/guidelines/in-develop/cardiovascular-risk-reduction/tools/before-after) (Accessed July 2014).*

15. Hozo SP, Djulbegovic B, Hozo I. *Estimating the mean and variance from the median, range, and the size of a sample. BMC Med Res Methodol* 2005 ; 5 : 13.
16. Higgins JP, Green S, editors. *Cochrane handbook for systematic reviews of interventions. Chichester (England) : John Wiley & Sons ; 2008. <http://onlinelibrary.wiley.com/book/10.1002/9780470712184> (Accessed August 2015).*
17. Regwan S, Hulten EA, Martinho S, Slim J, Villines TC, Mitchell J, Slim AM. *Marathon running as a cause of troponin elevation : a systematic review and meta-analysis. J Interv Cardiol* 2010 ; 23 : 443–50.
18. Fortescue EB, Shin AY, Greenes DS, Mannix RC, Agarwal S, Feldman BJ, et al. *Cardiac troponin increases among runners in the Boston Marathon. Ann Emerg Med* 2007 ; 49 : 137–43, 43 e1.
19. Shave R, Baggish A, George K, Wood M, Scharhag J, Whyte G, et al. *Exercise-induced cardiac troponin elevation : evidence, mechanisms, and implications. J Am Coll Cardiol* 2010 ; 56 : 169–76.
20. Neumayr G, Pfister R, Mitterbauer G, Eibl G, Hoertnagl H. *Effect of competitive marathon cycling on plasma N-terminal pro-brain natriuretic peptide and cardiac troponin T in healthy recreational cyclists. Am J Cardiol* 2005 ; 96 : 732–5.
21. Mousavi N, Czarnecki A, Kumar K, Fallah-Rad N, Lytwyn M, Han SY, et al. *Relation of biomarkers and cardiac magnetic resonance imaging after marathon running. Am J Cardiol* 2009 ; 103 : 1467–72.
22. Frassl W, Kowoll R, Katz N, Speth M, Stangl A, Brechtel L, et al. *Cardiac markers (BNP, NT-pro-BNP, troponin I, troponin T, in female amateur runners before and up until three days after a marathon. Clin Lab* 2008 ; 54 : 81–7.
23. Klok FA, Mos IC, Huisman MV. *Brain-type natriuretic peptide levels in the prediction of adverse outcome in patients with pulmonary embolism : a systematic review and meta-analysis. Am J Respir Crit Care Med* 2008 ; 178 : 425–30.
24. Neilan TG, Januzzi JL, Lee-Lewandrowski E, Ton-Nu TT, Yoerger DM, Jassal DS, et al. *Myocardial injury and ventricular dysfunction related to training levels among nonelite participants in the Boston marathon. Circulation* 2006 ; 114 : 2325–33.
25. Middleton N, Shave R, George K, Whyte G, Forster J, Oxborough D, et al. *Novel application of flow propagation velocity and ischaemia-modified albumin in analysis of postexercise cardiac function in man. Exp Physiol* 2006 ; 91 : 511–9.
26. Sumann G, Fries D, Griesmacher A, Falkensammer G, Klingler A, Koller A, et al. *Blood coagulation activation and fibrinolysis during a downhill marathon run. Blood Coagul Fibrinolysis* 2007 ; 18 : 435–40.
27. Prisco D, Paniccchia R, Bandinelli B, Fedi S, Cellai AP, Liotta AA, et al. *Evaluation of clotting and fibrinolytic activation after protracted physical exercise. Thromb Res* 1998 ; 89 : 73–8.

28. Kupchak BR, Volk BM, Kunces LJ, Kraemer WJ, Hoffman MD, Phinney SD, Volek JS. *Alterations in coagulatory and fibrinolytic systems following an ultra-marathon. Eur J Appl Physiol* 2013 ; 113 : 2705–12.
29. Sand KL, Flatebo T, Andersen MB, Maghazachi AA. *Effects of exercise on leukocytosis and blood hemostasis in 800 healthy young females and males. World J Exp Med* 2013 ; 3 : 11–20.
30. Lualdi JC, Goldhaber SZ. *Right ventricular dysfunction after acute pulmonary embolism : pathophysiological factors, detection, and therapeutic implications. Am Heart J* 1995 ; 130 : 1276–82.
31. Price LC, Wort SJ, Finney SJ, Marino PS, Brett SJ. *Pulmonary vascular and right ventricular dysfunction in adult critical care : current and emerging options for management : a systematic literature review. Crit Care* 2010 ; 14 : R169.
32. Mooij CF, de Wit CJ, Graham DA, Powell AJ, Geva T. *Reproducibility of MRI measurements of right ventricular size and function in patients with normal and dilated ventricles. J Magn Reson Imaging* 2008 ; 28 : 67–73.
33. Middleton N, Shave R, George K, Whyte G, Hart E, Atkinson G. *Left ventricular function immediately following prolonged exercise : a meta-analysis. Med Sci Sports Exerc* 2006 ; 38 : 681–7.
34. Baldesberger S, Bauersfeld U, Candinas R, Seifert B, Zuber M, Ritter M, et al. *Sinus node disease and arrhythmias in the long-term follow-up of former professional cyclists. Eur Heart J* 2008 ; 29 : 71–8.
35. Trivax JE, McCullough PA. *Phidippides cardiomyopathy : a review and case illustration. Clin Cardiol* 2012 ; 35 : 69–73.
36. Scharhag J, Herrmann M, Urhausen A, Haschke M, Herrmann W, Kindermann W. *Independent elevations of N-terminal pro-brain natriuretic peptide and cardiac troponins in endurance athletes after prolonged strenuous exercise. Am Heart J* 2005 ; 150 : 1128–34.
37. George KP, Dawson E, Shave RE, Whyte G, Jones M, Hare E, et al. *Left ventricular systolic function and diastolic filling after intermittent high intensity team sports. Br J Sports Med* 2004 ; 38 : 452–6.
38. Shave R, Dawson E, Whyte G, George K, Ball D, Collinson P, Gaze D. *The cardiospecificity of the third-generation cTnT assay after exercise-induced muscle damage. Med Sci Sports Exerc* 2002 ; 34 : 651–4.
39. Dawson EA, Shave R, George K, Whyte G, Ball D, Gaze D, Collinson P. *Cardiac drift during prolonged exercise with echocardiographic evidence of reduced diastolic function of the heart. Eur J Appl Physiol* 2005 ; 94 : 305–9.
40. Shave RE, Dawson E, Whyte G, George K, Gaze D, Collinson P. *Effect of prolonged exercise in a hypoxic environment on cardiac function and cardiac troponin t. Br J Sports Med* 2004 ; 38 : 86–8.
41. Shave R, Dawson E, Whyte G, George K, Nimmo M, Layden J, et al. *The impact of prolonged exercise in a cold environment upon cardiac function. Med Sci Sports Exerc* 2004 ; 36 : 1522–7.

42. Tulloh L, Robinson D, Patel A, Ware A, Prendergast C, Sullivan D, Pressley L. *Raised troponin T and echocardiographic abnormalities after prolonged strenuous exercise—the Australian Ironman Triathlon. Br J Sports Med* 2006 ; 40 : 605–9.
43. Shave R, Dawson E, Whyte G, George K, Gaze D, Collinson P. *Altered cardiac function and minimal cardiac damage during prolonged exercise. Med Sci Sports Exerc* 2004 ; 36 : 1098–103.
44. Shave RE, Dawson E, Whyte G, George K, Ball D, Gaze DC, Collinson PO. *Evidence of exercise-induced cardiac dysfunction and elevated cTnT in separate cohorts competing in an ultra-endurance mountain marathon race. Int J Sports Med* 2002 ; 23 : 489–94.
45. Ohba H, Takada H, Musha H, Nagashima J, Mori N, Awaya T, et al. *Effects of prolonged strenuous exercise on plasma levels of atrial natriuretic peptide and brain natriuretic peptide in healthy men. Am Heart J* 2001 ; 141 : 751–8.
46. Oomah SR, Mousavi N, Bhullar N, Kumar K, Walker JR, Lytwyn M, et al. *The role of three-dimensional echocardiography in the assessment of right ventricular dysfunction after a half marathon : comparison with cardiac magnetic resonance imaging. J Am Soc Echocardiogr* 2011 ; 24 : 207–13.
47. Baker P, Davies SL, Larkin J, Moulton D, Benton S, Roberts A, Harris T. *Changes to the cardiac biomarkers of non-elite athletes completing the 2009 London Marathon. Emerg Med J* 2014 ; 31 : 374–9.
48. Knebel F, Spethmann S, Schattke S, Dreger H, Schroeckh S, Schimke I, et al. *Exercise-induced changes of left ventricular diastolic function in postmenopausal amateur marathon runners : assessment by echocardiography and cardiac biomarkers. Eur J Prev Cardiol* 2012 ; 21 : 782–90.
49. Lippi G, Schena F, Salvagno GL, Montagnana M, Gelati M, Tarperi C, et al. *Influence of a half-marathon run on NT-proBNP and troponin T. Clin Lab* 2008 ; 54 : 251–4.
50. Karlstedt E, Chelvanathan A, Da Silva M, Cleverley K, Kumar K, Bhullar N, et al. *The impact of repeated marathon running on cardiovascular function in the aging population. J Cardiovasc Magn Reson* 2012 ; 14 : 58.
51. Mingels A, Jacobs L, Michielsen E, Swaanenburg J, Wodzig W, van Dieijen-Visser M. *Reference population and marathon runner sera assessed by highly sensitive cardiac troponin T and commercial cardiac troponin T and I assays. Clin Chem* 2009 ; 55 : 101–8.
52. Knebel F, Schimke I, Schroeckh S, Peters H, Eddicks S, Schattke S, et al. *Myocardial function in older male amateur marathon runners : assessment by tissue Doppler echocardiography, speckle tracking, and cardiac biomarkers. J Am Soc Echocardiogr* 2009 ; 22 : 803–9.
53. Jassal DS, Moffat D, Krahn J, Ahmadie R, Fang T, Eschun G, Sharma S. *Cardiac injury markers in non-elite marathon runners. Int J Sports Med* 2009 ; 30 : 75–9.
54. Saenz AJ, Lee-Lewandrowski E, Wood MJ, Neilan TG, Siegel AJ, Januzzi JL, Lewandrowski KB. *Measurement of a plasma stroke biomarker panel and cardiac troponin T in marathon runners before and after the 2005 Boston marathon. Am J Clin Pathol* 2006 ; 126 : 185–9.



55. Leers MP, Schepers R, Baumgarten R. *Effects of a long-distance run on cardiac markers in healthy athletes. Clin Chem Lab Med* 2006 ; 44 : 999–1003.
56. Whyte G, George K, Shave R, Dawson E, Stephenson C, Edwards B, et al. *Impact of marathon running on cardiac structure and function in recreational runners. Clin Sci (Lond)* 2005 ; 108 : 73–80.
57. George K, Whyte G, Stephenson C, Shave R, Dawson E, Edwards B, et al. *Postexercise left ventricular function and cTnT in recreational marathon runners. Med Sci Sports Exerc* 2004 ; 36 : 1709–15.
58. Shave RE, Dawson E, Whyte PG, George K, Ball D, Gaze CD, Collinson P. *Cardiac troponin T in female athletes during a two-day mountain marathon. Scott Med J* 2003 ; 48 : 41–2.
59. Apple FS, Quist HE, Otto AP, Mathews WE, Murakami MM. *Release characteristics of cardiac biomarkers and ischemia-modified albumin as measured by the albumin cobalt-binding test after a marathon race. Clin Chem* 2002 ; 48 : 1097–100.
60. Middleton N, Shave R, George K, Whyte G, Simpson R, Florida-James G, Gaze D. *Impact of repeated prolonged exercise bouts on cardiac function and biomarkers. Med Sci Sports Exerc* 2007 ; 39 : 83–90.
61. Wedin JO, Henriksson AE. *Postgame elevation of cardiac markers among elite floorball players. Scand J Med Sci Sports* 2015 ; 25 : 495–500.
62. Aagaard P, Sahlen A, Bergfeldt L, Braunschweig F. *Heart rate and its variability in response to running-associations with troponin. Med Sci Sports Exerc* 2014 ; 46 : 1624–30.
63. Scherr J, Braun S, Schuster T, Hartmann C, Moehlenkamp S, Wolfarth B, et al. *72-h kinetics of high-sensitive troponin T and inflammatory markers after marathon. Med Sci Sports Exerc* 2011 ; 43 : 1819–27.
64. Serrano Ostariz E, Lopez Ramon M, Cremades Arroyos D, Izquierdo Alvarez S, Catalan Edo P, Baquer Sahun C, Legaz Arrese A. *Post-exercise left ventricular dysfunction measured after a long-duration cycling event. BMC Res Notes* 2013 ; 6 : 211.
65. Salvagno GL, Schena F, Gelati M, Danese E, Cervellin G, Guidi GC, Lippi G. *The concentration of high-sensitivity troponin I, galectin-3 and NT-proBNP substantially increase after a 60-km ultramarathon. Clin Chem Lab Med* 2014 ; 52 : 267–72.
66. Eijsvogels TM, Hoogerwerf MD, Maessen MF, Seeger JP, George KP, Hopman MT, Thijssen DH. *Predictors of cardiac troponin release after a marathon. J Sci Med Sport* 2015 ; 18 : 88–92.
67. Legaz-Arrese A, George K, Carranza-Garcia LE, Munguia-Izquierdo D, Moros-Garcia T, Serrano-Ostariz E. *The impact of exercise intensity on the release of cardiac biomarkers in marathon runners. Eur J Appl Physiol* 2011 ; 111 : 2961–7.
68. O'Hanlon R, Wilson M, Wage R, Smith G, Alpendurada FD, Wong J, et al. *Troponin release following endurance exercise : is inflammation the cause? A cardiovascular magnetic resonance study. J Cardiovasc Magn Reson* 2010 ; 12 : 38.

69. Ban , Lippi G, Susta D, Barassi A, D'Eril GM, Dogliotti G, Corsi MM. *NT-proBNP concentrations in mountain marathoners. J Strength Cond Res* 2010 ; 24 : 1369–72.
70. Trivax JE, Franklin BA, Goldstein JA, Chinnaiyan KM, Gallagher MJ, deJong AT, et al. *Acute cardiac effects of marathon running. J Appl Physiol (1985)* 2010 ; 108 : 1148–53.
71. Smith JE, Garbutt G, Lopes P, Pedoe DT. *Effects of prolonged strenuous exercise (marathon running) on biochemical and haematological markers used in the investigation of patients in the emergency department. Br J Sports Med* 2004 ; 38 : 292–4.
72. Aagaard P, Sahlen A, Braunschweig F. *Performance trends and cardiac biomarkers in a 30-km cross-country race, 1993–2007. Med Sci Sports Exerc* 2012 ; 44 : 894–9.
73. Parker BA, Augeri AL, Capizzi JA, Ballard KD, Kupchak BR, Volek JS, et al. *Effect of marathon run and air travel on pre- and post-run soluble d-dimer, microparticle procoagulant activity, and p-selectin levels. Am J Cardiol* 2012 ; 109 : 1521–5.
74. Rifai N, Douglas PS, O'Toole M, Rimm E, Ginsburg GS. *Cardiac troponin T and I, echocardiographic [correction of electrocardiographic] wall motion analyses, and ejection fractions in athletes participating in the Hawaii Ironman Triathlon. Am J Cardiol* 1999 ; 83 : 1085–9.
75. Douglas PS, O'Toole ML, Woolard J. *Regional wall motion abnormalities after prolonged exercise in the normal left ventricle. Circulation* 1990 ; 82 : 2108–14.
